# Supplementary material
Source: PubMed Central journal article supplement (PMC3569480)

Supplementary Figure.

**Purification of *E. coli* IscA and IscA mutant Y40F and their relative iron binding activity *in vitro*.** **A)**, SDS-PAGE gel of purified *E. coli* wild-type IscA and IscA mutant Y40F. **B)**, relative iron binding affinity of wild-type IscA and IscA mutant Y40F *in vitro*. Wild-type IscA and IscA mutant Y40F (25  $\mu\text{M}$  in dimer) were incubated with indicated concentrations of  $\text{Fe}(\text{NH}_4)_2\text{SO}_4$  in the presence of dithiothreitol (2 mM). Protein was re-purified from the incubation solutions and subjected to iron content analyses. Ratio of iron to IscA dimer were plotted as a function of the iron concentrations in incubation solutions.

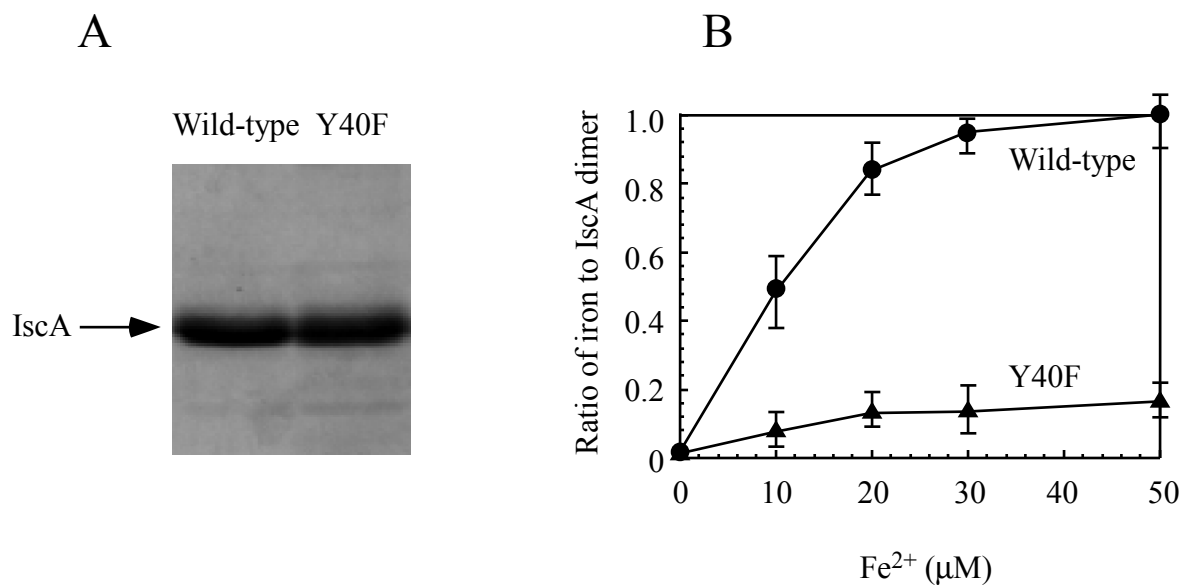

Supplement: NIHMS436881-supplement-ESI.pdf [file NIHMS436881-supplement-ESI.pdf]
